# Supplementary material for: “电子信息科学与技术”专业实践教学研究——以池州学院为例
Source: MDPI journal article supplement (doi:10.3390/ijerph18105396), 2010-01-01
Supplement: s1 [file ijerph-1201733-supplementary.pdf › ijerph-1201733-supplementary.pdf]

**Supplementary file: Quality Appraisal**

**Table S1. Quality Assessment of Controlled Intervention Studies.**

| Appraisal questions                                                                                                                                                  | Alipour et al 2020 [49] | Milgrom et al 2016 [48] | Ortiz Collado et al 2014 [50] | Mulcahy et al 2010 [20] |
|----------------------------------------------------------------------------------------------------------------------------------------------------------------------|-------------------------|-------------------------|-------------------------------|-------------------------|
| 1. Was the study described as randomized, a randomized trial, a randomized clinical trial, or an RCT?                                                                | Yes                     | Yes                     | Yes                           | Yes                     |
| 2. Was the method of randomization adequate (i.e., use of randomly generated assignment)?                                                                            | Yes                     | Yes                     | Yes                           | Yes                     |
| 3. Was the treatment allocation concealed (so that assignments could not be predicted)?                                                                              | Yes                     | Yes                     | Yes                           | Yes                     |
| 4. Were study participants and providers blinded to treatment group assignment?                                                                                      | No                      | No                      | No                            | No                      |
| 5. Were the people assessing the outcomes blinded to the participants' group assignments?                                                                            | Yes                     | Yes                     | CD                            | Yes                     |
| 6. Were the groups similar at baseline on important characteristics that could affect outcomes (e.g., demographics, risk factors, co-morbid conditions)?             | Yes                     | Yes                     | Yes                           | Yes                     |
| 7. Was the overall drop-out rate from the study at endpoint 20% or lower of the number allocated to treatment?                                                       | Yes                     | Yes                     | No                            | Yes                     |
| 8. Was the differential drop-out rate (between treatment groups) at endpoint 15 percentage points or lower?                                                          | Yes                     | Yes                     | No                            | Yes                     |
| 9. Was there high adherence to the intervention protocols for each treatment group?                                                                                  | Yes                     | Yes                     | Yes                           | Yes                     |
| 10. Were other interventions avoided or similar in the groups (e.g., similar background treatments)?                                                                 | Yes                     | CD                      | CD                            | No.                     |
| 11. Were outcomes assessed using valid and reliable measures, implemented consistently across all study participants?                                                | Yes                     | Yes                     | Yes                           | Yes                     |
| 12. Did the authors report that the sample size was sufficiently large to be able to detect a difference in the main outcome between groups with at least 80% power? | Yes                     | No.                     | No.                           | Yes.                    |
| 13. Were outcomes reported or subgroups analyzed prespecified (i.e., identified before analyses were conducted)?                                                     | Yes                     | Yes                     | Yes                           | Yes                     |
| 14. Were all randomized participants analyzed in the group to which they were originally assigned, i.e., did they use an intention-to-treat analysis?                | CD                      | Yes                     | Yes                           | No.                     |

Keys Y (Yes), N (No), Other (CD, cannot determine; NA, not applicable; NR, not reported)

<https://www.nhlbi.nih.gov/health-topics/study-quality-assessment-tools>

**Table S2. Quality Assessment Tool for Before-After (Pre-Post) Studies with No Control Group**

| Appraisal questions                                                                                                                                                                        | Cluxton-Keller et al 2018 [41] | Thomas et al 2014 [31] | Danaher et al 2013 [43] | Thome & Arnardot-tir, 2013 [47] | Brandon et al 2012 [46] |
|--------------------------------------------------------------------------------------------------------------------------------------------------------------------------------------------|--------------------------------|------------------------|-------------------------|---------------------------------|-------------------------|
| 1. Was the study question or objective clearly stated?                                                                                                                                     | Yes                            | Yes                    | Yes                     | Yes                             | Yes                     |
| 2. Were eligibility/selection criteria for the study population pre-specified and clearly described?                                                                                       | Yes                            | Yes                    | Yes                     | Yes                             | Yes                     |
| 3. Were the participants in the study representative of those who would be eligible for the test/service/intervention in the general or clinical population of interest?                   | Yes                            | Yes                    | Yes                     | Yes                             | Yes                     |
| 4. Were all eligible participants that met the pre-specified entry criteria enrolled?                                                                                                      | Yes                            | Yes                    | Yes                     | Yes                             | Yes                     |
| 5. Was the sample size sufficiently large to provide confidence in the findings?                                                                                                           | CD                             | CD                     | CD                      | Yes.                            | CD                      |
| 6. Was the test/service/intervention clearly described and delivered consistently across the study population?                                                                             | Yes                            | Yes                    | Yes                     | Yes                             | Yes                     |
| 7. Were the outcome measures prespecified, clearly defined, valid, reliable, and assessed consistently across all study participants?                                                      | Yes                            | Yes                    | Yes                     | Yes                             | Yes                     |
| 8. Were the people assessing the outcomes blinded to the participants' exposures/interventions?                                                                                            | CD                             | No                     | No                      | CD                              | CD                      |
| 9. Was the loss to follow-up after baseline 20% or less? Were those lost to follow-up accounted for in the analysis?                                                                       | Yes                            | CD                     | Yes                     | No                              | Yes                     |
| 10. Did the statistical methods examine changes in outcome measures from before to after the intervention? Were statistical tests done that provided p values for the pre-to-post changes? | Yes                            | Yes                    | Yes                     | Yes                             | Yes                     |

|                                                                                                                                                                                                                             |      |     |     |                   |     |
|-----------------------------------------------------------------------------------------------------------------------------------------------------------------------------------------------------------------------------|------|-----|-----|-------------------|-----|
| 11. Were outcome measures of interest taken multiple times before the intervention and multiple times after the intervention (i.e., did they use an interrupted time-series design)?                                        | Yes. | Yes | Yes | Pre and post test | Yes |
| 12. If the intervention was conducted at a group level (e.g., a whole hospital, a community, etc.) did the statistical analysis take into account the use of individual-level data to determine effects at the group level? | NA   | NA  | NA  | NA                | NA  |

Keys Y (Yes), N (No), Other (CD, cannot determine; NA, not applicable; NR, not reported)

<https://www.nhlbi.nih.gov/health-topics/study-quality-assessment-tools>
